# Supplementary material for: Turn-on and label-free fluorescence detection of lead ions based on target-induced G-quadruplex formation
Source: Royal Society of Chemistry journal article supplement (doi:10.1039/c5cc01590a), 2015-01-01
Supplement: c5cc01590a1.pdf [file c5cc01590a1.pdf]

## *Supporting Information for*

### **Turn-on and label-free fluorescent detection of lead ion based on target-induced G-quadruplex formation**

**Lijun Xu,<sup>a,b</sup> Xiaoqiang Shen,<sup>a,c</sup> Shanni Hong,<sup>a,b</sup> Jine Wang,<sup>a</sup> Yuanyuan Zhang,<sup>a</sup> Hongyan Wang,<sup>a</sup> Jianye Zhang,<sup>c</sup> and Renjun Pei<sup>a</sup>**

<sup>a</sup> Key Laboratory of Nano-Bio Interface, Division of Nanobiomedicine, Collaborative Innovation Center of Suzhou Nano Science and Technology, Suzhou Institute of Nano-Tech and Nano-Bionics, Chinese Academy of Sciences, Suzhou 215123, (P. R. China)

<sup>b</sup> University of Chinese Academy of Sciences, Beijing 100049, China

<sup>c</sup> School of Chemistry and Molecular Engineering, Zhengzhou University, Zhengzhou 450001, China

#### **Experimental Details**

**Materials and Reagents.** Oligonucleotides were obtained from Sangon Biotechnology Co. Ltd. (Shanghai, China). The stock solution of DNA samples were prepared in ultrapure water, and stored at -20 °C. Concentrations of DNA were accurately quantified using UV absorbance at 260 nm. NMM was purchased from J&K Scientific Ltd. (Beijing, China). The stock solution of NMM was prepared in dimethyl sulfoxide (DMSO) and stored in darkness at -20 °C. The concentration of NMM was accurately quantified using UV-VIS spectrophotometer ( $\lambda = 379$  nm, extinction coefficient =  $1.45 \times 10^5$  M<sup>-1</sup> cm<sup>-1</sup>). Thioflavin T (ThT) was purchased from Sigma-Aldrich, Co. (St. Louis, MO, USA). Berberine chloride was purchased from Aladdin Industrial Inc. (Shanghai, China). Other chemicals were of analytical grade and purchased from Sinopharm Chemical Reagent Co. Ltd. (Shanghai, China). Milli-Q water was used to prepare solutions. Measurements were performed in 10 mM Tris-HAc buffer (pH 7.4), unless stated otherwise.

The DNA sequences are as follows:

AGRO100: 5'-GGTGGTGGTGGTTGTGGTGGTGGTGG-3';

G3T4: 5'-GGGTTTTGGGTTTTGGGTTTTGGG-3';

G3T4TT4: 5'-GGGTTTTGGGTGGGTTTTGGG-3'.

**Instrumentation.** F-4600 Fluorescence spectrometer (Hitachi, Tokyo, Japan) was employed to record fluorescence spectra. The excitation wavelength was fixed at 399, 425, and 365 nm for NMM, ThT and berberine, respectively. The CD spectra of DNAs in the Tris-HAc buffer were collected by a Chirascan-plus Circular Dichroism Spectrometers (Applied Photophysics Ltd, Surrey, UK). Three scans from 220 to 320 at 0.1 nm intervals were accumulated and averaged.

**Fluorescence measurements.** For metal ions sensing, DNA sequence and metal ions were added to Tris-HAc (10 mM, pH 7.4) working buffer, and incubated for 5 min at room temperature. Then NMM was added to the mixture before measurement of the fluorescence spectra. The assay procedures for ThT and berberine were the same as those for NMM, except that ThT and berberine with corresponding DNA sequences were used instead.

**Circular Dichroism (CD) Measurements.** DNA sequences and metal ions were added to Tris-HAc (10 mM, pH 7.4) working buffer, incubated for 5 min at room temperature, and CD spectra were

measured.

### Analysis of real samples

Water sample was collected from Dushu Lake of Suzhou and first filtered through a 0.22  $\mu\text{m}$  membranes before using. After adding different concentrations of  $\text{Pb}^{2+}$ , these samples were diluted with Tris-HAc buffer, mixed with AGRO100 (0.4  $\mu\text{M}$ ) and incubated for 5 min at room temperature. Then NMM was added to the mixture before measurement of the fluorescence spectra. Water samples were diluted 20-fold finally.

After adding 5  $\mu\text{M}$   $\text{Pb}^{2+}$  into fetal bovine serum, these samples were diluted with Tris-HAc buffer, mixed with AGRO100 (0.4  $\mu\text{M}$ ) and incubated for 5 min at room temperature. Then NMM was added to the mixture before measurement of the fluorescence spectra. Serum samples were diluted 50-fold finally.

**Table S1.** Comparison of G-quadruplex-based label-free  $\text{Pb}^{2+}$  biosensors

| Methods                                               | Linear range                                              | Limit of detection | Remarks <sup>a</sup>                                                                                                | Testing time    | Ref.      |
|-------------------------------------------------------|-----------------------------------------------------------|--------------------|---------------------------------------------------------------------------------------------------------------------|-----------------|-----------|
| PS2.M/NMM                                             | 5 nM - 1 $\mu\text{M}$                                    | 1 nM               | Signal off ( $F_0/F \approx 11.5$ )                                                                                 | > 30 min        | 1         |
| PS2.M/Iridium(III) complex                            | 0 - 2.5 nM                                                | 600 pM             | Signal on ( $F/F_0 \approx 1.8$ )                                                                                   | > 1 h           | 2         |
| TBAA/cationic water-soluble conjugated polymer (PMNT) | 0 - 120 nM                                                | 6 nM               | Signal on ( $F/F_0 \approx 3$ )                                                                                     | several minutes | 3         |
| PS2.M capped CdS QDs                                  | 20 nM - 1 $\mu\text{M}$                                   | 10 nM              | Signal on ( $F/F_0 \approx 1.7$ )                                                                                   | > 1 h           | 4         |
| T30695/ZnPPIX                                         | 20 nM - 1 $\mu\text{M}$                                   | 20 nM              | Signal on (using partly complementary strand to reduce background, $F/F_0 \approx 6$ )                              | > 5 h           | 5         |
| AGRO100 DNAzyme/AUR                                   | 0 - 1 $\mu\text{M}$                                       | 0.4 nM             | Signal on ( $F/F_0 \approx 6$ )                                                                                     | > 3 h           | 6         |
| PS2.M DNAzyme/ABTS or luminol                         | $10^{-7}$ M to $10^{-5}$ M or $10^{-9}$ M - $10^{-6.5}$ M | 32 nM or 1 nM      | Signal off ( $\text{Pb}^{2+}$ -induced decrease in peroxidase activity, $A_0/A \approx 1.3$ , $F_0/F \approx 1.4$ ) | > 2 h           | 7         |
| AGRO100/NMM                                           | 0 - 1 $\mu\text{M}$                                       | 3 nM               | Signal on ( $F/F_0 \approx 16$ )                                                                                    | several minutes | This work |

<sup>a</sup>  $F_0$  (or  $A_0$ ),  $F$  (or  $A$ ) denote the fluorescence (or absorbance) of the sensor in the absence of  $\text{Pb}^{2+}$ , and presence of the linear upper bound  $\text{Pb}^{2+}$  concentration, respectively.

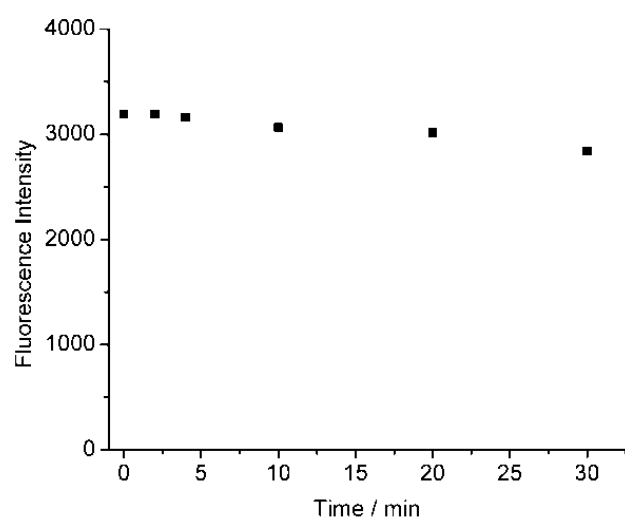

**Figure S1.** Fluorescence intensity at 610 nm of this AGRO100-NMM system against reaction time after all composition was mixed. Experimental conditions: 1  $\mu\text{M}$  AGRO100, 1  $\mu\text{M}$  NMM, and 1  $\mu\text{M}$   $\text{Pb}^{2+}$  in 10 mM Tris-HAc (pH 7.4) buffer solutions.

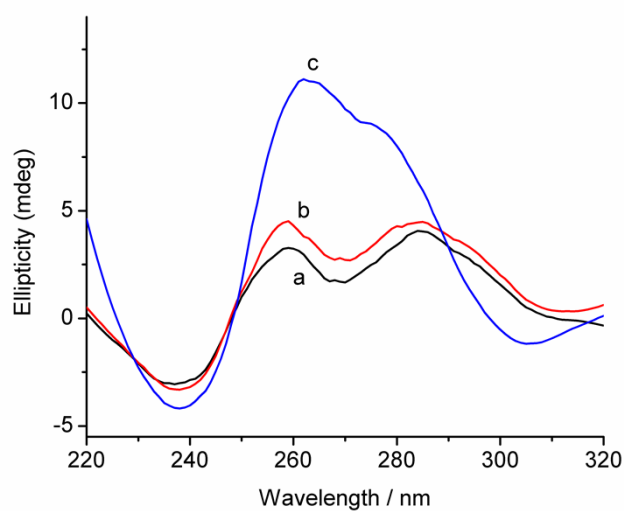

**Figure S2.** Circular dichroism (CD) spectra for characterizing the AGRO100 structural conversion in the absence (a), and presence of 100  $\mu\text{M}$   $\text{K}^+$  (b) and 1  $\mu\text{M}$   $\text{Pb}^{2+}$  (c). Experimental conditions: 4  $\mu\text{M}$  AGRO100 in 10 mM Tris-HAc (pH 7.4) buffer solutions.

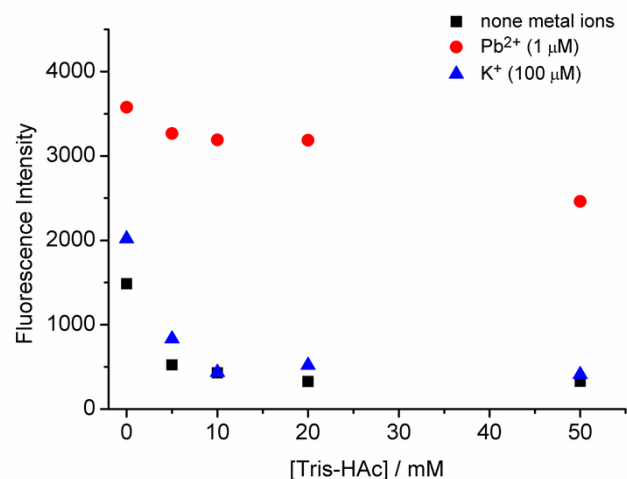

**Figure S3.** Effect of the concentration of Tris-HAc buffer on AGRO100-NMM probe in the absence, and presence of Pb<sup>2+</sup> (1.0 μM) or K<sup>+</sup> ions (100 μM). The concentration of AGRO100 and NMM are 1.0, 1.0 μM, respectively.

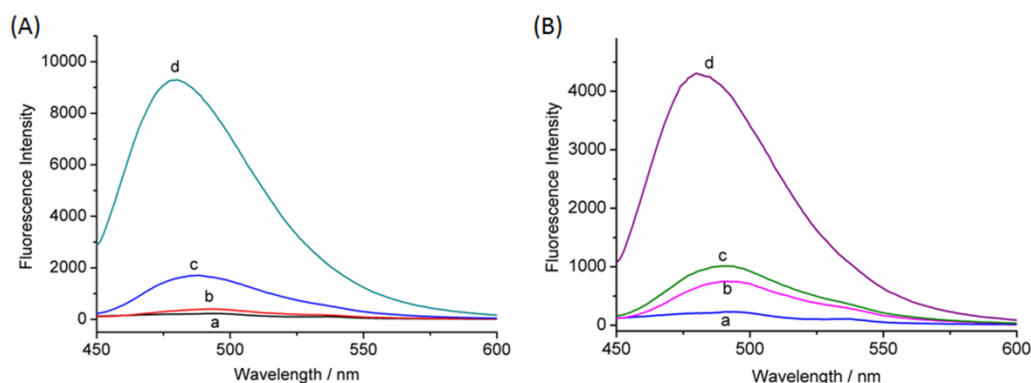

**Figure S4.** (A) Fluorescence spectra for turn-on detection of Pb<sup>2+</sup> using ThT and G3T4: (a) ThT (0.4 μM); (b) ThT (0.4 μM) and G3T4 (0.4 μM); (c) ThT (0.4 μM), G3T4 (0.4 μM), and K<sup>+</sup> (100 μM); (d) ThT (0.4 μM), G3T4 (0.4 μM), and Pb<sup>2+</sup> (1 μM). (B) Fluorescence spectra for turn-on detection of Pb<sup>2+</sup> using ThT and G3T4TT4: (a) ThT (0.4 μM); (b) ThT (0.4 μM) and G3T4TT4 (0.4 μM); (c) ThT (0.4 μM), G3T4TT4 (0.4 μM), and K<sup>+</sup> (100 μM); (d) ThT (0.4 μM), G3T4TT4 (0.4 μM), and Pb<sup>2+</sup> (1 μM).

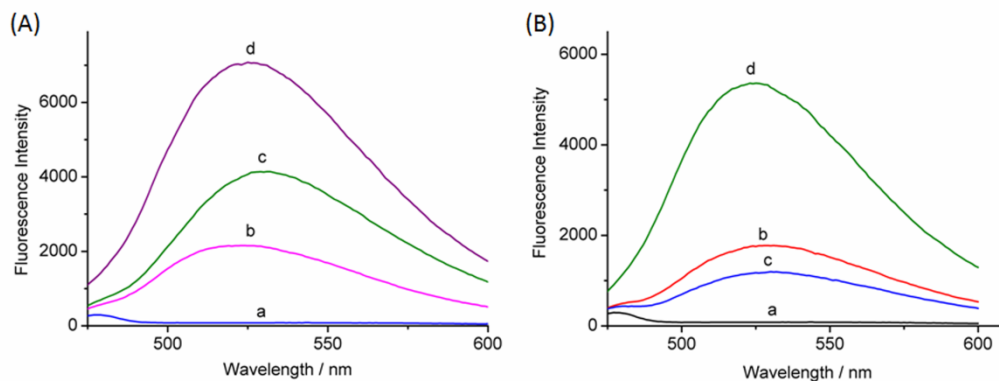

**Figure S5.** (A) Fluorescence spectra for turn-on detection of Pb<sup>2+</sup> using Berberine and G3T4: (a)

Berberine (5  $\mu\text{M}$ ); (b) Berberine (5  $\mu\text{M}$ ) and G3T4 (1  $\mu\text{M}$ ); (c) Berberine (5  $\mu\text{M}$ ), G3T4 (1  $\mu\text{M}$ ), and  $\text{K}^+$  (100  $\mu\text{M}$ ); (d) Berberine (5  $\mu\text{M}$ ), G3T4 (1  $\mu\text{M}$ ), and  $\text{Pb}^{2+}$  (5  $\mu\text{M}$ ). (B) Fluorescence spectra for turn-on detection of  $\text{Pb}^{2+}$  using Berberine and G3T4TT4: (a) Berberine (5  $\mu\text{M}$ ); (b) Berberine (5  $\mu\text{M}$ ) and G3T4TT4 (1  $\mu\text{M}$ ); (c) Berberine (5  $\mu\text{M}$ ), G3T4TT4 (1  $\mu\text{M}$ ), and  $\text{K}^+$  (100  $\mu\text{M}$ ); (d) Berberine (5  $\mu\text{M}$ ), G3T4TT4 (1  $\mu\text{M}$ ), and  $\text{Pb}^{2+}$  (5  $\mu\text{M}$ ).

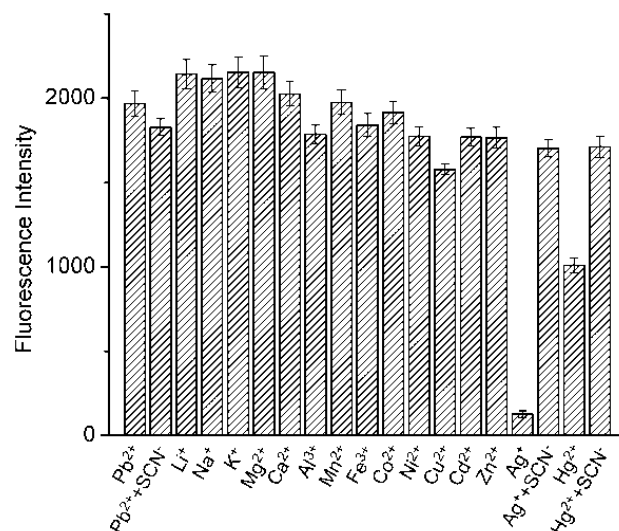

**Figure S6.** Competitive experiments of the AGRO100-NMM probe. The bars denote the fluorescence intensity when  $\text{Pb}^{2+}$  (1  $\mu\text{M}$ ) coexisted with other individual metal ions (100  $\mu\text{M}$   $\text{Li}^+$ , 100  $\mu\text{M}$   $\text{Na}^+$ , 100  $\mu\text{M}$   $\text{K}^+$ , 100  $\mu\text{M}$   $\text{Mg}^{2+}$ , 100  $\mu\text{M}$   $\text{Ca}^{2+}$ , 10  $\mu\text{M}$   $\text{Al}^{3+}$ , 10  $\mu\text{M}$   $\text{Mn}^{2+}$ , 10  $\mu\text{M}$   $\text{Fe}^{3+}$ , 3  $\mu\text{M}$   $\text{Co}^{2+}$ , 1  $\mu\text{M}$   $\text{Ni}^{2+}$ , 10  $\mu\text{M}$   $\text{Cu}^{2+}$ , 3  $\mu\text{M}$   $\text{Cd}^{2+}$ , 3  $\mu\text{M}$   $\text{Zn}^{2+}$ , 10  $\mu\text{M}$   $\text{Ag}^+$ , and 10  $\mu\text{M}$   $\text{Hg}^{2+}$ ). 10 mM NaSCN was added to mask  $\text{Ag}^+$  and  $\text{Hg}^{2+}$  ions. Error bars represent standard deviations from three repeated measurements.

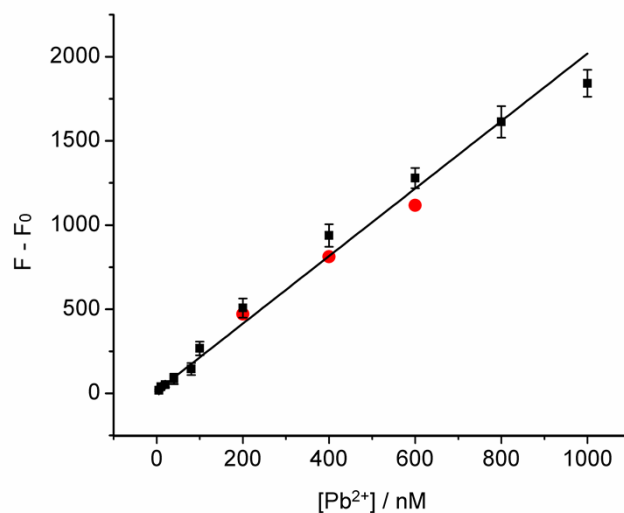

**Figure S7.** Detection of  $\text{Pb}^{2+}$  in lake water samples. ■: data obtained from sensitivity experiments; ●: data of analyzing real water samples. 200, 400, and 600 nM  $\text{Pb}^{2+}$  were spiked into water samples, and the recovery values obtained were 115.4%, 100.2%, and 92.3%, respectively.

## References

1. L. Guo, D. Nie, C. Qiu, Q. Zheng, H. Wu, P. Ye, Y. Hao, F. Fu and G. Chen, *Biosens. Bioelectron.*, 2012, **35**, 123-127.
2. H. Z. He, K. H. Leung, H. Yang, D. S. H. Chan, C. H. Leung, J. Zhou, A. Bourdoncle, J. L. Mergny and D. L. Ma, *Biosens. Bioelectron.*, 2013, **41**, 871-874.
3. Y. Lu, X. Li, G. Wang and W. Tang, *Biosens. Bioelectron.*, 2013, **39**, 231-235.
4. S. Liu, W. Na, S. Pang and X. Su, *Biosens. Bioelectron.*, 2014, **58**, 17-21.
5. T. Li, S. Dong and E. Wang, *J. Am. Chem. Soc.*, 2010, **132**, 13156-13157.
6. C. L. Li, K. T. Liu, Y. W. Lin and H. T. Chang, *Anal. Chem.*, 2011, **83**, 225-230.
7. T. Li, E. Wang and S. Dong, *Anal. Chem.*, 2010, **82**, 1515-1520.
